1 **Differential response to prey quorum signals indicates predatory range of**  
2 **myxobacteria**

3

4 Shukria Akbar<sup>a</sup>, Sandeep K. Misra<sup>a</sup>, Joshua S. Sharp<sup>a,b</sup>, and D. Cole Stevens<sup>a,#</sup>

5

6 Department of BioMolecular Sciences, University of Mississippi, University, MS, USA<sup>a</sup>

7 Department of Chemistry and Biochemistry, University of Mississippi, University, MS,

8 USA<sup>b</sup>

9

10 #Address correspondence to Cole Stevens, [stevens@olemiss.edu](mailto:stevens@olemiss.edu).

11

12 **Running Head:** Myxobacterial response to prey quorum signals

13

14 **Originality-Significance Statement:** This manuscript provides the first multiomic  
15 analysis of how predatory myxobacteria respond to exogenous prey signaling molecules  
16 and details the differences observed by comparing responses from two myxobacteria.

17

18 **Summary:** Multiomic analysis of transcriptional and metabolic responses from the  
19 predatory myxobacteria *Myxococcus xanthus* and *Cystobacter ferrugineus* exposed to  
20 prey signaling molecules of the acylhomoserine lactone and quinolone quorum signaling  
21 classes provided insight into myxobacterial specialization associated with predatory  
22 eavesdropping. We suggest that the general response observed from both myxobacteria  
23 exposed to acylhomoserine lactone quorum signals is likely due to the generalist predator

24 lifestyles of myxobacteria and ubiquity of acylhomoserine lactone signals. We also  
25 provide data that indicates the core homoserine lactone moiety included in all  
26 acylhomoserine lactone scaffolds to be sufficient to induce this general response.  
27 Comparing both myxobacteria, unique transcriptional and metabolic responses were  
28 observed from *Cystobacter ferrugineus* exposed to the quinolone signal 4-hydroxy-2-  
29 heptylquinoline (HHQ) natively produced by *Pseudomonas aeruginosa*. We suggest that  
30 this unique response and ability to metabolize quinolone signals contribute to the superior  
31 predation of *P. aeruginosa* observed from *C. ferrugineus*. These results further  
32 demonstrate myxobacterial eavesdropping on prey signaling molecules and provide  
33 insight into how responses to exogenous signals might correlate with prey range of  
34 myxobacteria.

35 **Abstract:** A potential keystone taxa, myxobacteria contribute to the microbial food web  
36 as generalist predators. However, the extent of myxobacterial impact on microbial  
37 community structure remains unknown. The chemical ecology of these predator-prey  
38 interactions provides insight into myxobacterial production of biologically active  
39 specialized metabolites used to benefit consumption of prey as well as the perception of  
40 quorum signals secreted by prey. Using comparative transcriptomics and metabolomics,  
41 we compared how the predatory myxobacteria *Myxococcus xanthus* and *Cystobacter*  
42 *ferrugineus* respond to structurally distinct exogenous quorum signaling molecules.  
43 Investigating acylhomoserine lactone (AHL) and quinolone type quorum signals used by  
44 the clinical pathogen *Pseudomonas aeruginosa*, we identified a general response to AHL  
45 signals from both myxobacteria as well as a unique response from *C. ferrugineus* when  
46 exposed to the quinolone signal 4-hydroxy-2-heptylquinolone (HHQ). Oxidative  
47 detoxification of HHQ in *C. ferrugineus* was not observed from *M. xanthus*. Subsequent  
48 predation assays indicated *P. aeruginosa* to be more susceptible to *C. ferrugineus*  
49 predation. These data indicate that as generalist predators myxobacteria demonstrate a  
50 common response to the ubiquitous AHL quorum signal class, and we suggest this  
51 response likely involves recognition of the homoserine lactone moiety of AHLs. We also  
52 suggest that oxidation of HHQ and superior predation of *P. aeruginosa* observed from *C.*  
53 *ferrugineus* provides an example of how prey signaling molecules impact predatory  
54 specialization of myxobacteria by influencing prey range.

55

## 56 **Introduction**

57 The uniquely multicellular lifestyles of myxobacteria have motivated continued efforts to  
58 explore the myxobacterium *Myxococcus xanthus* as a model organism for cooperative  
59 behaviors including development (Islam et al., 2020; Sharma et al., 2021), motility  
60 (Mercier et al., 2020; Rendueles and Velicer, 2020; Zhang et al., 2020b), and predation  
61 (Thiery and Kaimer, 2020; Zhang et al., 2020a; Sydney et al., 2021). Often attributed to  
62 their need to acquire nutrients as generalist predators (Nair et al., 2019) and capacity to  
63 prey upon clinical pathogens (Livingstone et al., 2017), myxobacteria have also been a  
64 valuable resource for the discovery of novel specialized metabolites as potential  
65 therapeutic lead compounds (Herrmann et al., 2017; Baltz, 2019; Perez et al., 2020). The  
66 diversities in structural scaffolds and observed activities as well as the unique chemical  
67 space associated with myxobacterial metabolites when compared with more thoroughly  
68 explored Actinobacteria make myxobacteria excellent sources for efforts focused on the  
69 discovery of therapeutics (Herrmann et al., 2017; Baltz, 2019). However, the connection  
70 between myxobacterial predation and production of these biologically active metabolites  
71 remains underexplored. Currently, only the metabolites myxovirescin (Xiao et al., 2011;  
72 Ellis et al., 2019; Wang et al., 2019) and myxoprincomide (Cortina et al., 2012; Muller et  
73 al., 2016) have been directly implicated to be involved during *Myxococcus xanthus*  
74 predation of *Escherichia coli* and *Bacillus subtilis* respectively. In fact, the chemical  
75 ecology of predator-prey interactions between myxobacteria and prey remains  
76 underexplored (Findlay, 2016). The predatory capacity or prey range of myxobacteria  
77 cannot be directly correlated with phylogeny (Livingstone et al., 2017; Arend et al., 2020).  
78 Presently, the best determinants for broadly assessing prey ranges are genetic features

79 that might provide specific traits to overcome predation resistances of individual prey. For  
80 example, myxobacteria possessing the formaldehyde dismutase gene *fdm* demonstrated  
81 comparatively better predation of toxic formaldehyde secreting *Pseudomonas aeruginosa*  
82 a clinical pathogen observed to be somewhat recalcitrant to myxobacterial predation  
83 (Arend et al., 2020).

84 The recent observation that acylhomoserine lactone (AHL) quorum signals from prey  
85 microbes impact the predatory capacity of *M. xanthus* suggests that quorum signals might  
86 influence predator-prey interactions (Lloyd and Whitworth, 2017). Although two orphaned,  
87 functional AHL synthases have been reported, no myxobacteria have been observed to  
88 produce AHLs (Albataineh et al., 2021). However, a recent survey of signaling systems  
89 within the family Myxococcaceae reported the presence of conserved AHL receptor  
90 (LuxR) homologs and inferred that many myxobacteria within the 2 genera *Myxococcus*  
91 and *Corallococcus* are capable of sensing AHL signaling molecules (Whitworth and  
92 Zwarycz, 2020). While this suggests that predatory myxobacteria might eavesdrop on  
93 prey quorum signaling, the observed reaction from *M. xanthus* might also simply be the  
94 result of exogenous AHLs as a nutritional gradient. Herein we utilize a combination of  
95 transcriptomics and metabolomics to determine how myxobacterial responses to quorum  
96 signals produced by *P. aeruginosa* might indicate predatory capacity.

97 By exposing myxobacteria to structurally and functionally distinct classes of prey quorum  
98 signals comparing ubiquitous AHL signals and quinolone signals more unique to  
99 pseudomonads (Papenfort and Bassler, 2016), we anticipated that a differential response  
100 exclusive to a specific signal class would support predatory eavesdropping and perhaps  
101 correlate with improved predation of *P. aeruginosa*. For these experiments we exposed

102 each myxobacterium to AHL signals (Galloway et al., 2011) as well as the quinolone  
103 signal 4-hydroxy-2-heptylquinolone (HHQ) (Deziel et al., 2004; Dubern and Diggle, 2008;  
104 Garcia-Reyes et al., 2020). Ubiquitous to Proteobacteria (notably excluding  
105 myxobacteria) and numerous other non-Proteobacteria genera, AHLs are the most  
106 common class of quorum signal autoinducers and are often implicated in interspecies  
107 communication within polymicrobial communities (Shiner et al., 2005; Mukherjee and  
108 Bassler, 2019). Also associated with the modulation of interspecies and interkingdom  
109 behaviors (Reen et al., 2011), the quinolone signal HHQ contributes to the pathogenicity  
110 of *P. aeruginosa* by participating in the regulation of various virulence factors (Dubern  
111 and Diggle, 2008; Reen et al., 2011). Exploration of the myxobacterial response to prey  
112 quorum signals not only provides insight into the impact of shared chemical signals might  
113 have on predator-prey interactions within bacterial communities but may also provide  
114 further genetic determinants that indicate predatory capacities of myxobacteria.

115 As a model organism for developmental studies, *M. xanthus* is the best characterized  
116 myxobacterium and has already demonstrated a behavioral response to exogenous AHLs  
117 (Lloyd and Whitworth, 2017). However, we suspected that routine use as a laboratory  
118 strain, constitutive toxicity (Livingstone et al., 2018), and well-explored specialized  
119 metabolism (Cortina et al., 2012; Herrmann et al., 2017) of *M. xanthus* might diminish its  
120 viability as the sole myxobacterium for these experiments. Therefore, *Cystobacter*  
121 *ferrugineus* was also included as a more recent myxobacterial isolate with a less explored  
122 biosynthetic capacity and prey range (Akbar et al., 2017; Goes et al., 2020). Both *M.*  
123 *xanthus* and *C. ferrugineus* have an annotated solo LuxR-type AHL receptor present in  
124 their genomes (WP\_011555271.1 and WP\_071900454.1) (Subramoni and Venturi, 2009;

125 Tobias et al., 2020; Xu, 2020). However, homology-based annotation of these features  
126 only indicates the helix-turn-helix DNA-binding domain of LuxR receptors, and neither  
127 include an AHL-binding site motif (PF03472) (Baikalov et al., 1996; Vannini et al., 2002;  
128 Mukherjee and Bassler, 2019). Despite the absence of a canonical receptor, exogenous  
129 AHLs have been observed to stimulate the motility and predatory activity of *M. xanthus*  
130 (Lloyd and Whitworth, 2017). Also of note, neither *M. xanthus* or *C. ferrugineus* possess  
131 a homologous PqsR-type HHQ receptor (Diggle et al., 2003; Wade et al., 2005). Utilizing  
132 a multiomic approach to assess the transcriptomic and metabolomic responses of *M.*  
133 *xanthus* and *C. ferrugineus* when exposed to AHL and quinolone signals, we sought to  
134 determine if structurally and functionally dissimilar quorum signals from prey elicit distinct  
135 responses from predatory myxobacteria that correlate with successful predation of *P.*  
136 *aeruginosa*.

## 137 **Results**

### 138 **C6-AHL induces a general transcriptional response from both *M. xanthus* and *C.*** 139 ***ferrugineus***

140 Exposure experiments utilizing a concentration of C6-AHL previously shown to elicit a  
141 predatory response from *M. xanthus* (9  $\mu$ M) (Lloyd and Whitworth, 2017) were conducted  
142 in triplicate for both *M. xanthus* and *C. ferrugineus* with DMSO exposures serving as  
143 vehicle, negative controls for comparative analysis. Comparative transcriptomic analysis  
144 from RNAseq data revealed C6-AHL exposure impacted transcription of a total of 76  
145 genes from *C. ferrugineus* experiments and just nine genes from *M. xanthus* experiments  
146 when only considering a  $\geq 4$ -fold change in transcription at  $p \leq 0.01$  (Figure 1,  
147 Supplemental Dataset 1). For this reason, our analysis of *M. xanthus* exposure

148 experiments was expanded to include significant features at  $p \leq 0.05$  resulting in an  
149 updated total of 59 impacted features from C6-AHL exposure (Figure 1). While this  
150 indicates less variability across *C. ferrugineus* exposure experiments, we contend that  
151 this expansion provides a broader and more thorough analysis of statistically significant  
152 impacted features for our analysis. A similar consideration of *C. ferrugineus* genes with  
153  $\geq 4$ -fold change in transcription at  $p \leq 0.05$  by C6-AHL exposure would provide an  
154 additional 119 impacted genes for consideration (Supplemental Dataset 1). *M. xanthus*  
155 features included at the more stringent significance cutoff of  $p \leq 0.01$  are indicated in  
156 Figure 1. These data revealed that C6-AHL exposure elicited a general downregulation  
157 of genes with a total of 55 downregulated genes observed from *M. xanthus* and 51 genes  
158 from *C. ferrugineus*. Only one gene was observed to be upregulated by *M. xanthus* when  
159 exposed to C6-AHL, and 25 total upregulated genes were observed from *C. ferrugineus*  
160 during C6-AHL exposure.

161 Comparing annotated features impacted by C6-AHL exposure across both datasets and  
162 their putative roles by general system, numerous features involved in signal transduction  
163 pathways and transcriptional regulation were included in both datasets with seven  
164 regulatory features downregulated by *M. xanthus* and six downregulated by *C.*  
165 *ferrugineus* (Figure 2). Both myxobacteria also had a TetR family transcriptional regulator  
166 upregulated by C6-AHL exposure. Multiple features associated with primary and  
167 specialized metabolisms and cell wall biogenesis and maintenance were downregulated  
168 by C6-AHL exposure across both datasets. Considering previous reports that C6-AHL  
169 exposure suppresses *M. xanthus* sporulation (Lloyd and Whitworth, 2017), we sought to  
170 determine if C6-AHL exposure effected either of the transcriptional regulators associated



171 with *M. xanthus* sporulation FruA or MrpC (Ogawa et al., 1996; Robinson et al., 2014;  
172 Marcos-Torres et al., 2020). While no significant change in FurA was observed,  
173 transcription of the gene product MrpC was downregulated 1.7-fold by *M. xanthus*  
174 exposure to C6-AHL. However, transcription of the FruA (WP\_071904077.1) or MrpC  
175 (WP\_071900118) homologs from *C. ferrugineus* was not significantly changed by C6-  
176 AHL exposure. While no obvious predatory features associated with motility or lytic  
177 enzymes were directly impacted in our C6-AHL exposed *M. xanthus* results, we suspect  
178 that this could be due to the previously reported constitutive toxicity of *M. xanthus*  
179 observed in both the presence and absence of prey (Livingstone et al., 2018). The  
180 increased transcription of lytic enzymes and mobile genetic elements observed from *C.*  
181 *ferrugineus* exposed to C6-AHL suggest a predatory response; however, these features  
182 could also be associated with a defense response akin to phage defense. Transcription  
183 of neither of the annotated LuxR-type receptors (*M. xanthus*, WP\_011555271.1; *C.*  
184 *ferrugineus*, WP\_071900454.1) was affected by C6-AHL exposure. Overall considering  
185 the most significantly impacted features across both datasets, C6-AHL exposure elicited  
186 somewhat similar responses from both myxobacteria including numerous features  
187 associated with transcriptional regulation and signal transduction, primary and  
188 specialized metabolisms, and cell wall maintenance.

### 189 **HHQ elicits contrasting responses from *M. xanthus* and *C. ferrugineus***

190 Comparative transcriptomics from RNAseq data from exposure experiments with HHQ (9  
191  $\mu$ M) introduced to plates of *M. xanthus* and *C. ferrugineus* were also conducted in  
192 triplicate with DMSO exposures serving as HHQ unexposed, negative controls for  
193 comparative analysis. Comparative transcriptomic analysis from RNAseq data revealed

194 HHQ exposure led to a  $\geq 4$ -fold ( $p \leq 0.05$ ) change in transcription of a total of 186 genes  
195 from *C. ferrugineus* and 31 total genes from *M. xanthus* (Figure 3). Unlike the similar  
196 responses elicited by C6-AHL exposure, contrasting responses were apparent when  
197 comparing data between the myxobacteria. Data from *M. xanthus* experiments revealed  
198 overlap between responses to C6-AHL and HHQ with a total of nine upregulated genes  
199 and 22 downregulated genes including five genes also downregulated by C6-AHL  
200 exposure. Overlapping annotated features impacted by both C6-AHL and HHQ included  
201 a NmrA/HSCARG family protein (WP\_011556972.1), an immunity 49 family protein  
202 (WP\_011550233.1), a CHASE2 domain-containing protein (WP\_011554259.1), and two  
203 hypothetical proteins (WP\_011555268.1 and WP\_011552217.1). Comparing impacted  
204 genes from AHL and HHQ exposure experiments, further overlap between putative roles  
205 of annotated genes was also observed from *M. xanthus* with multiple impacted genes  
206 predicted to be involved in transcriptional regulation and signal transduction and cell wall  
207 biogenesis and maintenance (Figure 2 and Figure 4). Of note, the pleiotropic regulator  
208 MrpC was also downregulated 2.2-fold in *M. xanthus* exposed to HHQ which is  
209 comparable to 1.7-fold downregulation of MrpC observed with C6-AHL exposure.  
210 Unlike the overlap in responses to both signals observed from *M. xanthus*, none of the  
211 186 genes effected by HHQ exposure overlapped with the 76 genes impacted by C6-AHL  
212 exposure. Considering annotated genes by functional category, *C. ferrugineus* genes  
213 upregulated by HHQ exposure (156 total) were largely associated with signal transduction  
214 and transcriptional regulation, various metabolic pathways, and multiple genes  
215 associated with protein translation and turnover, cell wall biogenesis and maintenance,  
216 and specialized metabolism were downregulated (29 total) (Figure 4). Interestingly, an

217 annotated FAD-dependent oxidoreductase (WP\_071901324.1) homologous to the  
218 monooxygenase PsqH from *P. aeruginosa* (91% coverage; 38% identity) which  
219 hydroxylates HHQ to yield 2-heptyl-3,4-dihydroxyquinolone or pseudomonas quinolone  
220 signal (PQS) was upregulated 31-fold (Diggle et al., 2003; Ritzmann et al., 2021). An  
221 outlier to the contrasting responses to HHQ, an annotated DUF2378 family protein (*M.*  
222 *xanthus*, WP\_011553830.1; *C. ferrugineus*, WP\_084736518.1) was significantly  
223 upregulated in both myxobacteria; DUF2378 family proteins are ~200 amino acid proteins  
224 with no known function that are exclusive to myxobacteria. Overall, these results indicate  
225 that *M. xanthus* exhibits a similar transcriptional response to both C6-AHL and HHQ  
226 whereas HHQ elicits a distinct response from *C. ferrugineus* dissimilar from the more  
227 general response observed from both myxobacteria when exposed to C6-AHL.

#### 228 **Differential metabolic impact of AHL and HHQ signals**

229 Subsequent exposure experiments were conducted with *M. xanthus* and *C. ferrugineus*  
230 exactly as done for our RNAseq experiments with an additional AHL signal, 3-oxo-C6-  
231 AHL, also included. Crude, organic phase extracts generated from these experiments  
232 were subjected to untargeted mass spectrometry and the XCMS-MRM (v3.7.1) platform  
233 (Domingo-Almenara et al., 2018; Forsberg et al., 2018) was utilized for comparative  
234 analysis and determination of statistical significance for all detected features. Comparing  
235 features with significantly impacted intensities ( $p \leq 0.02$ ) during these signal exposure  
236 experiments, all three signals elicited a more apparent response from *C. ferrugineus*  
237 (Figure 5 and Supplemental Figure 1). Despite the comparatively diminished response  
238 from *M. xanthus*, two general trends were apparent when comparing the signals  
239 responses between both myxobacteria. First, C6-AHL and 3-oxo-C6-AHL exposure

240 resulted in highly similar responses from both myxobacteria with few to no uniquely  
241 impacted features specific to either AHL signal (Figure 5). Second, HHQ exposure  
242 induced a dramatic change in the metabolic profile of *C. ferrugineus* that was not  
243 observed from HHQ-exposed *M. xanthus*. A total of 47 features from *C. ferrugineus* were  
244 impacted by both AHL signals while 133 features were affected by HHQ exposure.  
245 Intrigued by the difference in responses, additional experiments where both myxobacteria  
246 were exposed to exogenous C6-AHL and HHQ simultaneously were done. Comparative  
247 analysis of results revealed that the addition of C6-AHL did not dramatically impact the  
248 change in metabolic profile observed from either myxobacteria when exposed to HHQ  
249 (Figure 6). Conversely, impacted features observed in our previous AHL exposure  
250 experiments were not observed in our C6-AHL + HHQ experiments. For example, of the  
251 47 total overlapping *C. ferrugineus* features with significantly changed intensities during  
252 AHL exposure conditions, 36 were not observed to change during C6-AHL + HHQ  
253 exposure experiments. From these results, we determined that both myxobacteria  
254 demonstrate a metabolic response unique to either HHQ or AHL-type chemical signals  
255 with a conserved response to both C6-AHL and 3-oxo-C6-AHL. These data also revealed  
256 a unique metabolic response from *C. ferrugineus* when exposed to HHQ similar to our  
257 previous transcriptomic observation.

### 258 **Conserved metabolomic response to AHLs and determination of core L-** 259 **homoserine lactone elicitor**

260 Intrigued by the overlap in metabolic responses observed from AHL signal exposure, we  
261 were curious if the core homoserine lactone moiety present in all AHL-type quorum  
262 signals was sufficient to elicit a similar response. Untargeted mass spectrometry and

263 XCMS-MRM analysis of additional exposure experiments with *C. ferrugineus* including  
264 either L-homoserine lactone (L-HSL) the stereoisomer present in natural AHL-type  
265 quorum signals (Papenfort and Bassler, 2016; Mukherjee and Bassler, 2019), D-  
266 homoserine lactone (D-HSL) the enantiomer of L-HSL, or boiled C6-AHL were completed  
267 to determine any overlap with previously observed responses to C6-AHL and 3-oxo-C6-  
268 AHL exposure. Comparative analysis of statistically impacted features by signal intensity  
269 ( $p \leq 0.02$ ) revealed 20 overlapping features from the L-HSL, C6-AHL, and 3-oxo-C6-AHL  
270 exposure experiments and just three overlapping features from the L-HSL, D-HSL, C6-  
271 AHL, and 3-oxo-C6-AHL exposure experiments (Figure 7, Supplemental Figure 2).  
272 Hierarchical clustering of detected feature intensities from L-HSL, D-HSL, C6-AHL, and  
273 control datasets also revealed clustering between L-HSL and C6-AHL datasets  
274 (Supplemental Figure 3). These results suggest that the core homoserine lactone core  
275 present in all AHLs is sufficient for predatory eavesdropping by myxobacteria.

#### 276 **Oxidative detoxification of HHQ observed from *C. ferrugineus***

277 Comparing metabolomic datasets from HHQ exposure experiments, oxidized analogs of  
278 HHQ detected at 260.164 m/z were exclusive to the *C. ferrugineus* dataset. Authentic  
279 standards for the oxidized HHQ quinolone signals PQS and 2-heptyl-4-hydroxyquinoline  
280 *N*-oxide (HQNO) were used to determine that both oxidized signals were present in HHQ-  
281 exposed *C. ferrugineus* extracts (Figure 8, Supplemental Figure 4) (Cao et al., 2020).  
282 Oxidative detoxification of quinolone signals including HHQ has been reported from  
283 numerous bacteria (Thierbach et al., 2017; Ritzmann et al., 2021). Additional experiments  
284 exposing *C. ferrugineus* to either PQS or HQNO provided insight into a similar oxidative  
285 detoxification route for quinolone signals with HHQ observed to be oxidized to either

286 HQNO or PQS. The presence of a metabolite with an exact mass and similar MS<sup>2</sup>  
287 fragmentation pattern matching 2-heptyl-3,4-dihydroxyquinoline-*N*-oxide (PQS-NO) an  
288 oxidation product reported by Thierbach *et al.* was also observed in *C. ferrugineus*  
289 extracts from HHQ, PQS, and HQNO exposure experiments suggesting subsequent  
290 oxidation of both PQS and HQNO (Figure 8, Supplemental Figures 5 and 6) (Thierbach  
291 *et al.*, 2017). These results suggest that *C. ferrugineus* possesses a detoxification route  
292 for quinolone signals not observed from *M. xanthus* and oxidizes the quinolone signals  
293 HHQ, PQS, and HQNO.

#### 294 ***C. ferrugineus* response to HHQ correlates with superior predation of *P. aeruginosa***

295 Predation assays using the lawn culture method were conducted in triplicate on lawns of  
296 *P. aeruginosa* with both *M. xanthus* and *C. ferrugineus* (Morgan *et al.*, 2010). These  
297 assays confirmed that *P. aeruginosa* was comparatively more susceptible to predation by  
298 *C. ferrugineus* (Figure 9). These results suggest the unique response to exogenous HHQ  
299 observed from *C. ferrugineus* to be an evolved trait associated with exposure to quinolone  
300 signals that correlates with a prey range which includes quinolone signal-producing  
301 pseudomonads.

#### 302 **Discussion**

303 Although the predatory lifestyles of myxobacteria have long been associated with their  
304 capacity as a resource for natural products discovery, the chemical ecology of predator-  
305 prey interactions remains underexplored (Findlay, 2016; Munoz-Dorado *et al.*, 2016;  
306 Herrmann *et al.*, 2017). The recent discovery that exogenous AHL quorum signals  
307 associated with Gram-negative prey bacteria increase the predatory capacity of *M.*  
308 *xanthus* provides an excellent example of shared chemical space within microbial

309 communities influencing predation (Lloyd and Whitworth, 2017). Utilizing comparative  
310 transcriptomics and metabolomics, we sought to determine the generality of predatory  
311 eavesdropping and how the phenomenon might correlate with prey range by comparing  
312 responses from *M. xanthus* and *C. ferrugineus* when exposed to structurally distinct  
313 quorum signals associated with the clinical pathogen *P. aeruginosa*.

314 Initial transcriptomic data comparing *M. xanthus* and *C. ferrugineus* exposed to C6-AHL  
315 revealed overlapping transcriptional responses from both myxobacteria. Originally  
316 referenced as predatory eavesdropping, we sought to determine the impact of C6-AHL  
317 on genes with annotations affiliated with predation and predatory responses such as  
318 motility features, lytic enzymes, and specialized metabolism (Munoz-Dorado et al., 2016).

319 Transcription of multiple genes associated with transcriptional regulation, metabolism,  
320 and cell wall maintenance was influenced by exogenous C6-AHL across both  
321 myxobacteria. The only potential predatory features with a transcriptional response to C6-  
322 AHL exposure were putative lytic enzymes from *C. ferrugineus*, and no annotated genes  
323 predicted to be involved in motility were affected by C6-AHL in either myxobacteria.

324 Considering the original observation that AHLs stimulate predation by increasing the  
325 vegetative population of *M. xanthus*, we suggest that the observed change in transcription  
326 of genes associated with metabolism and signal transduction from both myxobacteria  
327 may correspond with a similar population-based response and shift in vegetative state  
328 (Lloyd and Whitworth, 2017). The decreased transcription of the gene encoding for MrpC,  
329 a developmental regulator involved in sporulation (Robinson et al., 2014), observed in our  
330 *M. xanthus* dataset also supports a population-based response to C6-AHL.



331 Subsequent comparative metabolomics experiments indicated that C6-AHL and 3-oxo-  
332 C6-AHL elicit overlapping responses from both myxobacteria and that the core AHL  
333 moiety L-HSL also elicits a similar response from *C. ferrugineus*. We conclude that the  
334 overlap between C6-AHL, 3-oxo-C6-AHL, and L-HSL indicates an evolved recognition of  
335 the homoserine lactone unit present in all AHL quorum signals (Papenfort and Bassler,  
336 2016; Mukherjee and Bassler, 2019). As generalist predators, a more general process for  
337 AHL perception that responds to a core moiety in the scaffold of AHLs might be preferred  
338 to a specialized process associated with the variable *N*-acylamides of AHLs. We also  
339 suspect this centralized response to L-HSL may relate to the absence of a LuxR-type  
340 AHL receptor that includes a conserved AHL-binding domain. The ubiquity of AHL  
341 quorum signals amongst Gram-negative bacteria combined with the overlap in observed  
342 responses from *M. xanthus* and *C. ferrugineus* suggest that AHL-based eavesdropping  
343 by myxobacteria could be a general trait that benefits predation.

344 Unlike the overlap in responses to AHL exposure, the quinolone signal HHQ elicited a  
345 contrasting transcriptomic from *M. xanthus* and *C. ferrugineus*. Contrary to *M. xanthus*,  
346 *C. ferrugineus* upregulated genes associated with signal transduction and transcriptional  
347 regulation, various metabolic pathways, and multiple genes associated with protein  
348 translation and turnover, cell wall biogenesis and maintenance, and specialized  
349 metabolism when exposed to HHQ. Interestingly, an annotated FAD-dependent  
350 oxidoreductase homologous to the monooxygenase PqsH from *P. aeruginosa*, which  
351 hydroxylates HHQ to yield PQS was upregulated 31-fold in *C. ferrugineus* exposed to  
352 HHQ. Subsequent metabolomic experiments confirmed the presence of two oxidized  
353 analogs of HHQ, PQS and HQNO (Dubern and Diggle, 2008; Thierbach et al., 2017). The



354 detection of these oxidized quinolones as well as an additional feature, PQS-NO,  
355 previously associated with the oxidative detoxification of quinolone signals in HHQ  
356 exposed *C. ferrugineus* samples and absence in *M. xanthus* samples suggests that *M.*  
357 *xanthus* is unable to similarly metabolize HHQ (Dubern and Diggle, 2008; Thierbach et  
358 al., 2017; Ritzmann et al., 2021). Oxidative detoxification of quinolone signals produced  
359 by pseudomonads has previously been reported from strains of *Arthrobacter*,  
360 *Rhodococcus*, and *Staphylococcus aureus* (Thierbach et al., 2017). We suggest that this  
361 oxidative detoxification process contributes to the superior predation of *P. aeruginosa*  
362 observed from *C. ferrugineus* in our predation assays comparing both myxobacteria.  
363 Despite being considered keystone taxa within microbial communities (Petters et al.,  
364 2021), the extent of myxobacterial bacterivory and its contribution to nutrient cycling within  
365 microbial food webs remains unknown. These results further demonstrate myxobacterial  
366 eavesdropping on prey signaling molecules and provide insight into how responses to  
367 exogenous signals might correlate with prey range of myxobacteria. Although broadly  
368 considered generalist predators, predatory specialization has been observed from  
369 myxobacteria. Oxidation of quinolone signals and superior predation of *P. aeruginosa*  
370 observed from *C. ferrugineus* provides an example of how prey signaling molecules and  
371 the shared chemical ecology of microbial communities influence myxobacterial predation.

## 372 **Experimental Procedures**

373 **Cultivation of *M. xanthus* and *C. ferrugineus*.** *Cystobacter ferrugineus* strain Cbfe23,  
374 DSM 52764, initially obtained from German Collection of Microorganisms (DSMZ) in  
375 Braunschweig, and *Myxococcus xanthus* strain GJV1 were employed in this study.  
376 *Cystobacter ferrugineus* was grown on VY/2 agar (5 g/L baker's yeast, 1.36 g/L CaCl<sub>2</sub>,

377 0.5 mg/L vitamin B12, 15 g/L agar, pH 7.2). Whereas, CTTYE agar (1.4% w/v agar, 1%  
378 Casitone, 10 mM Tris-HCl (pH 7.6), 1 mM potassium phosphate (pH 7.6), 8 mM MgSO<sub>4</sub>,  
379 0.5% yeast extract) was utilized to culture *M. xanthus*.

#### 380 **Quorum signal exposure experiments.**

381 For signal exposure conditions, required volumes for 9 μM of filter sterilized, HHQ  
382 (Sigma), C6-AHL (Cayman Chemical), 3-oxo-C6-AHL (Cayman Chemical), L-HSL  
383 (Cayman Chemical), D-HSL (Cayman Chemical), PQS (Sigma), and HQNO (Sigma) from  
384 a 150 mM stock prepared in DMSO were added to autoclaved medium at 55°C. Boiled  
385 AHL samples were prepared according to established methodology (Lloyd and Whitworth,  
386 2017). For RNA-seq and LC-MS/MS analysis, *C. ferrugineus* was cultivated on VY/2 agar  
387 medium, and *M. xanthus* was cultured on CTTYE agar medium. For all signal exposure  
388 experiments both myxobacteria were grown at 30°C with *C. ferrugineus* grown for 10 days  
389 and *M. xanthus* grown 14 days.

#### 390 **RNA sequencing experiments and analysis.**

391 Myxobacterial cells were scrapped from the agar plates and stored in RNA-ladder. Total  
392 RNA was isolated from the samples using the RNeasy PowerSoil Total RNA Kit (Qiagen)  
393 following the manufacturer's instructions. Consistent aliquots of biomass (500 mg) from  
394 each myxobacteria were used for RNA extractions. The concentration of total RNA was  
395 determined using the Qubit® RNA Assay Kit (Life Technologies). For rRNA depletion,  
396 first, 1000 ng of total RNA was used to remove the DNA contamination using Baseline-  
397 ZERO™ DNase (Epicentre) following the manufacturer's instructions followed by  
398 purification using the RNA Clean & Concentrator-5 columns (Zymo Research). DNA free  
399 RNA samples were used for rRNA removal by using RiboMinus™ rRNA Removal Kit

400 (Bacteria; Thermo Fisher Scientific) and final purification was performed using the RNA  
401 Clean & Concentrator-5 columns (Zymo Research). rRNA depleted samples were used  
402 for library preparation using the KAPA mRNA HyperPrep Kits (Roche) by following the  
403 manufacturer's instructions. Following the library preparation, the final concentration of  
404 each library was measured using the Qubit® dsDNA HS Assay Kit (Life Technologies),  
405 and average library size for each was determined using the Agilent 2100 Bioanalyzer  
406 (Agilent Technologies) (Supplemental Tables 1 and 2). The libraries were then pooled in  
407 equimolar ratios of 0.75 nM, and sequenced paired end for 300 cycles using the NovaSeq  
408 6000 system (Illumina). RNA sequencing was conducted by MR DNA (Molecular  
409 Research LP). RNAseq analysis was performed using ArrayStar V15 and the R-package  
410 DESeq2 for differential expression data. Raw data from RNAseq analysis publicly  
411 available at the National Center for Biotechnology Information Sequence Read Archive  
412 under the following BioProjects PRJNA555507, PRJNA730806, PRJNA730808.

#### 413 **Organic phase extraction of metabolites.**

414 After cultivation, myxobacterial plates were manually diced and extracted with excess  
415 EtOAc. Pooled EtOAc was filtered and dried *in vacuo* to provide crude extracts for  
416 LCMS/MS analysis. LC-MS/MS analysis of the extracted samples was performed on an  
417 Orbitrap Fusion instrument (Thermo Scientific, San Jose, CA) controlled with Xcalibur  
418 version 2.0.7 and coupled to a Dionex Ultimate 3000 nanoUHPLC system. Samples were  
419 loaded onto a PepMap 100 C18 column (0.3 mm × 150 mm, 2 µm, Thermo Fisher  
420 Scientific). Separation of the samples was performed using mobile phase A (0.1% formic  
421 acid in water) and mobile phase B (0.1% formic acid in acetonitrile) at a rate of 6 µL/min.  
422 The samples were eluted with a gradient consisting of 5 to 60% solvent B over 15 min,

423 ramped to 95% B over 2 min, held for 3 min, and then returned to 5% B over 3 min and  
424 held for 8 min. All data were acquired in positive ion mode. Collision induced dissociation  
425 (CID) was used to fragment molecules, with an isolation width of 3 m/z units. The spray  
426 voltage was set to 3600 volts, and the temperature of the heated capillary was set to  
427 300°C. In CID mode, full MS scans were acquired from m/z 150 to 1200 followed by eight  
428 subsequent MS<sup>2</sup> scans on the top eight most abundant peaks. The nominal orbitrap  
429 resolution for both the MS<sup>1</sup> and MS<sup>2</sup> scans was 60000. The expected mass accuracy  
430 based on external calibration was <3 ppm. MZmine 2.53 was used to generate extracted  
431 ion chromatograms (Pluskal et al., 2010).

#### 432 **XCMS analysis.**

433 Generated data were converted to .mzXML files using MS-Convert (Adusumilli and  
434 Mallick, 2017). Multigroup analysis of converted .mzXML files was done using XCMS-  
435 MRM and the default HPLC/Orbitrap parameters (Domingo-Almenara et al., 2018;  
436 Forsberg et al., 2018). Within the XCMS-MRM result tables, determination of signal-  
437 impacted detected features was afforded by filtering results for those with a  $p \leq 0.02$ .

438 **Lawn culture predation assays.** *Pseudomonas aeruginosa* ATCC 10145<sup>T</sup> was  
439 purchased from the American Type Culture Collection (ATCC). The predation experiment  
440 was performed according to (Pham et al., 2005; Morgan et al., 2010). Briefly, overnight  
441 grown culture of *P. aeruginosa* was pelleted at 5000 x g. The cell pellet was washed with  
442 TM buffer and pelleted again. The pelleted cells were resuspended in TM buffer to an  
443 OD<sub>600</sub> 0.5. A 250 µL volume of resuspended cell suspension was utilized to make a  
444 uniform bacterial lawn on a WAT agar plate. Myxobacterium *M. xanthus* GJV1 was grown  
445 on CTTYE agar, and *C. ferrugineus* was grown on VY/2 agar for 7 days. A 600 mm<sup>2</sup> agar

446 block of each myxobacteria was excised and placed at the center of the *P. aeruginosa*  
447 cell lawn. Assays were incubated at 30°C and swarm diameters measured after 4 days.

#### 448 **Acknowledgements.**

449 The authors appreciate funding and support from the National Institute of Allergy and  
450 Infectious Diseases (R15AI137996). Research reported in this publication was  
451 supported by an Institutional Development Award (IDeA) from the National Institute of  
452 General Medical Sciences of the National Institutes of Health under award number  
453 P20GM130460. The authors also appreciate Dr. Peter Zee for providing us with *M.*  
454 *xanthus* strain GJV1.

#### 455 **References.**

456 Adusumilli, R., and Mallick, P. (2017) Data Conversion with ProteoWizard msConvert.  
457 *Methods Mol Biol* **1550**: 339-368.  
458 Akbar, S., Dowd, S.E., and Stevens, D.C. (2017) Draft Genome Sequence of *Cystobacter*  
459 *ferrugineus* Strain Cbfe23. *Genome Announc* **5**.  
460 Albataineh, H., Duke, M., Misra, S.K., Sharp, J.S., and Stevens, D.C. (2021) Identification  
461 of a solo acylhomoserine lactone synthase from the myxobacterium *Archangium gephyra*.  
462 *Sci Rep* **11**: 3018.  
463 Arend, K.I., Schmidt, J.J., Bentler, T., Luchtefeld, C., Eggerichs, D., Hexamer, H.M., and  
464 Kaimer, C. (2020) *Myxococcus xanthus* predation of Gram-positive or Gram-negative  
465 bacteria is mediated by different bacteriolytic mechanisms. *Appl Environ Microbiol*.  
466 Baikalov, I., Schroder, I., Kaczor-Grzeskowiak, M., Grzeskowiak, K., Gunsalus, R.P., and  
467 Dickerson, R.E. (1996) Structure of the *Escherichia coli* response regulator NarL.  
468 *Biochemistry* **35**: 11053-11061.  
469 Baltz, R.H. (2019) Natural product drug discovery in the genomic era: realities,  
470 conjectures, misconceptions, and opportunities. *J Ind Microbiol Biotechnol* **46**: 281-299.  
471 Cao, T., Sweedler, J.V., Bohn, P.W., and Shrout, J.D. (2020) Spatiotemporal Distribution  
472 of *Pseudomonas aeruginosa* Alkyl Quinolones under Metabolic and Competitive Stress.  
473 *mSphere* **5**.

- 474 Cortina, N.S., Krug, D., Plaza, A., Revermann, O., and Muller, R. (2012) Myxoprincomide:  
475 a natural product from *Myxococcus xanthus* discovered by comprehensive analysis of the  
476 secondary metabolome. *Angew Chem Int Ed Engl* **51**: 811-816.
- 477 Deziel, E., Lepine, F., Milot, S., He, J., Mindrinos, M.N., Tompkins, R.G., and Rahme,  
478 L.G. (2004) Analysis of *Pseudomonas aeruginosa* 4-hydroxy-2-alkylquinolines (HAQs)  
479 reveals a role for 4-hydroxy-2-heptylquinoline in cell-to-cell communication. *Proc Natl*  
480 *Acad Sci U S A* **101**: 1339-1344.
- 481 Diggle, S.P., Winzer, K., Chhabra, S.R., Worrall, K.E., Camara, M., and Williams, P.  
482 (2003) The *Pseudomonas aeruginosa* quinolone signal molecule overcomes the cell  
483 density-dependency of the quorum sensing hierarchy, regulates rhl-dependent genes at  
484 the onset of stationary phase and can be produced in the absence of LasR. *Mol Microbiol*  
485 **50**: 29-43.
- 486 Domingo-Almenara, X., Montenegro-Burke, J.R., Ivanisevic, J., Thomas, A., Sidibe, J.,  
487 Teav, T. et al. (2018) XCMS-MRM and METLIN-MRM: a cloud library and public resource  
488 for targeted analysis of small molecules. *Nat Methods* **15**: 681-684.
- 489 Dubern, J.F., and Diggle, S.P. (2008) Quorum sensing by 2-alkyl-4-quinolones in  
490 *Pseudomonas aeruginosa* and other bacterial species. *Mol Biosyst* **4**: 882-888.
- 491 Ellis, B.M., Fischer, C.N., Martin, L.B., Bachmann, B.O., and McLean, J.A. (2019)  
492 Spatiochemically Profiling Microbial Interactions with Membrane Scaffolded Desorption  
493 Electrospray Ionization-Ion Mobility-Imaging Mass Spectrometry and Unsupervised  
494 Segmentation. *Anal Chem* **91**: 13703-13711.
- 495 Findlay, B.L. (2016) The Chemical Ecology of Predatory Soil Bacteria. *ACS Chem Biol*  
496 **11**: 1502-1510.
- 497 Forsberg, E.M., Huan, T., Rinehart, D., Benton, H.P., Warth, B., Hilmers, B., and Siuzdak,  
498 G. (2018) Data processing, multi-omic pathway mapping, and metabolite activity analysis  
499 using XCMS Online. *Nat Protoc* **13**: 633-651.
- 500 Galloway, W.R., Hodgkinson, J.T., Bowden, S.D., Welch, M., and Spring, D.R. (2011)  
501 Quorum sensing in Gram-negative bacteria: small-molecule modulation of AHL and AI-2  
502 quorum sensing pathways. *Chem Rev* **111**: 28-67.

503 Garcia-Reyes, S., Soberon-Chavez, G., and Cocotl-Yanez, M. (2020) The third quorum-  
504 sensing system of *Pseudomonas aeruginosa*: Pseudomonas quinolone signal and the  
505 enigmatic PqsE protein. *J Med Microbiol* **69**: 25-34.

506 Goes, A., Lapuhs, P., Kuhn, T., Schulz, E., Richter, R., Panter, F. et al. (2020)  
507 Myxobacteria-Derived Outer Membrane Vesicles: Potential Applicability Against  
508 Intracellular Infections. *Cells* **9**.

509 Herrmann, J., Fayad, A.A., and Muller, R. (2017) Natural products from myxobacteria:  
510 novel metabolites and bioactivities. *Nat Prod Rep* **34**: 135-160.

511 Islam, S.T., Vergara Alvarez, I., Saidi, F., Guiseppi, A., Vinogradov, E., Sharma, G. et al.  
512 (2020) Modulation of bacterial multicellularity via spatio-specific polysaccharide secretion.  
513 *PLoS Biol* **18**: e3000728.

514 Livingstone, P.G., Morphew, R.M., and Whitworth, D.E. (2017) Myxobacteria Are Able to  
515 Prey Broadly upon Clinically-Relevant Pathogens, Exhibiting a Prey Range Which Cannot  
516 Be Explained by Phylogeny. *Front Microbiol* **8**: 1593.

517 Livingstone, P.G., Millard, A.D., Swain, M.T., and Whitworth, D.E. (2018) Transcriptional  
518 changes when *Myxococcus xanthus* preys on *Escherichia coli* suggest myxobacterial  
519 predators are constitutively toxic but regulate their feeding. *Microb Genom* **4**.

520 Lloyd, D.G., and Whitworth, D.E. (2017) The Myxobacterium *Myxococcus xanthus* Can  
521 Sense and Respond to the Quorum Signals Secreted by Potential Prey Organisms. *Front*  
522 *Microbiol* **8**: 439.

523 Marcos-Torres, F.J., Volz, C., and Muller, R. (2020) An ambruticin-sensing complex  
524 modulates *Myxococcus xanthus* development and mediates myxobacterial interspecies  
525 communication. *Nat Commun* **11**: 5563.

526 Mercier, R., Bautista, S., Delannoy, M., Gibert, M., Guiseppi, A., Herrou, J. et al. (2020)  
527 The polar Ras-like GTPase MglA activates type IV pilus via SgmX to enable twitching  
528 motility in *Myxococcus xanthus*. *Proc Natl Acad Sci U S A* **117**: 28366-28373.

529 Morgan, A.D., MacLean, R.C., Hillesland, K.L., and Velicer, G.J. (2010) Comparative  
530 analysis of myxococcus predation on soil bacteria. *Appl Environ Microbiol* **76**: 6920-6927.

531 Mukherjee, S., and Bassler, B.L. (2019) Bacterial quorum sensing in complex and  
532 dynamically changing environments. *Nat Rev Microbiol* **17**: 371-382.



533 Muller, S., Strack, S.N., Ryan, S.E., Shawgo, M., Walling, A., Harris, S. et al. (2016)  
534 Identification of Functions Affecting Predator-Prey Interactions between *Myxococcus*  
535 *xanthus* and *Bacillus subtilis*. *J Bacteriol* **198**: 3335-3344.

536 Munoz-Dorado, J., Marcos-Torres, F.J., Garcia-Bravo, E., Moraleda-Munoz, A., and  
537 Perez, J. (2016) Myxobacteria: Moving, Killing, Feeding, and Surviving Together. *Front*  
538 *Microbiol* **7**: 781.

539 Nair, R.R., Vasse, M., Wielgoss, S., Sun, L., Yu, Y.N., and Velicer, G.J. (2019) Bacterial  
540 predator-prey coevolution accelerates genome evolution and selects on virulence-  
541 associated prey defences. *Nat Commun* **10**: 4301.

542 Ogawa, M., Fujitani, S., Mao, X., Inouye, S., and Komano, T. (1996) FruA, a putative  
543 transcription factor essential for the development of *Myxococcus xanthus*. *Mol Microbiol*  
544 **22**: 757-767.

545 Papenfort, K., and Bassler, B.L. (2016) Quorum sensing signal-response systems in  
546 Gram-negative bacteria. *Nat Rev Microbiol* **14**: 576-588.

547 Perez, J., Contreras-Moreno, F.J., Marcos-Torres, F.J., Moraleda-Munoz, A., and Munoz-  
548 Dorado, J. (2020) The antibiotic crisis: How bacterial predators can help. *Comput Struct*  
549 *Biotechnol J* **18**: 2547-2555.

550 Petters, S., Gross, V., Sollinger, A., Pichler, M., Reinhard, A., Bengtsson, M.M., and  
551 Urich, T. (2021) The soil microbial food web revisited: Predatory myxobacteria as  
552 keystone taxa? *ISME J*.

553 Pham, V.D., Shebelut, C.W., Diodati, M.E., Bull, C.T., and Singer, M. (2005) Mutations  
554 affecting predation ability of the soil bacterium *Myxococcus xanthus*. *Microbiology*  
555 *(Reading)* **151**: 1865-1874.

556 Pluskal, T., Castillo, S., Villar-Briones, A., and Oresic, M. (2010) MZmine 2: modular  
557 framework for processing, visualizing, and analyzing mass spectrometry-based molecular  
558 profile data. *BMC Bioinformatics* **11**: 395.

559 Reen, F.J., Mooij, M.J., Holcombe, L.J., McSweeney, C.M., McGlacken, G.P., Morrissey,  
560 J.P., and O'Gara, F. (2011) The *Pseudomonas* quinolone signal (PQS), and its precursor  
561 HHQ, modulate interspecies and interkingdom behaviour. *FEMS Microbiol Ecol* **77**: 413-  
562 428.



- 563 Rendueles, O., and Velicer, G.J. (2020) Hidden paths to endless forms most wonderful:  
564 Complexity of bacterial motility shapes diversification of latent phenotypes. *BMC Evol Biol*  
565 **20**: 145.
- 566 Ritzmann, N.H., Drees, S.L., and Fetzner, S. (2021) Signal Synthase-Type versus  
567 Catabolic Monooxygenases: Retracing 3-Hydroxylation of 2-Alkylquinolones and Their N-  
568 Oxides by *Pseudomonas aeruginosa* and Other Pulmonary Pathogens. *Appl Environ*  
569 *Microbiol* **87**.
- 570 Robinson, M., Son, B., Kroos, D., and Kroos, L. (2014) Transcription factor MrpC binds  
571 to promoter regions of hundreds of developmentally-regulated genes in *Myxococcus*  
572 *xanthus*. *BMC Genomics* **15**: 1123.
- 573 Sharma, G., Yao, A.I., Smaldone, G.T., Liang, J., Long, M., Facciotti, M.T., and Singer,  
574 M. (2021) Global gene expression analysis of the *Myxococcus xanthus* developmental  
575 time course. *Genomics* **113**: 120-134.
- 576 Shiner, E.K., Rumbaugh, K.P., and Williams, S.C. (2005) Inter-kingdom signaling:  
577 deciphering the language of acyl homoserine lactones. *FEMS Microbiol Rev* **29**: 935-947.
- 578 Subramoni, S., and Venturi, V. (2009) LuxR-family 'solos': bachelor sensors/regulators of  
579 signalling molecules. *Microbiology (Reading)* **155**: 1377-1385.
- 580 Sydney, N., Swain, M.T., So, J.M.T., Hoiczky, E., Tucker, N.P., and Whitworth, D.E.  
581 (2021) The Genetics of Prey Susceptibility to Myxobacterial Predation: A Review,  
582 Including an Investigation into *Pseudomonas aeruginosa* Mutations Affecting Predation  
583 by *Myxococcus xanthus*. *Microb Physiol*: 1-10.
- 584 Thierbach, S., Birmes, F.S., Letzel, M.C., Hennecke, U., and Fetzner, S. (2017) Chemical  
585 Modification and Detoxification of the *Pseudomonas aeruginosa* Toxin 2-Heptyl-4-  
586 hydroxyquinoline N-Oxide by Environmental and Pathogenic Bacteria. *ACS Chem Biol*  
587 **12**: 2305-2312.
- 588 Thiery, S., and Kaimer, C. (2020) The Predation Strategy of *Myxococcus xanthus*. *Front*  
589 *Microbiol* **11**: 2.
- 590 Tobias, N.J., Brehm, J., Kresovic, D., Brameyer, S., Bode, H.B., and Heermann, R. (2020)  
591 New Vocabulary for Bacterial Communication. *ChemBiochem* **21**: 759-768.

592 Vannini, A., Volpari, C., Gargioli, C., Muraglia, E., Cortese, R., De Francesco, R. et al.  
593 (2002) The crystal structure of the quorum sensing protein TraR bound to its autoinducer  
594 and target DNA. *EMBO J* **21**: 4393-4401.

595 Wade, D.S., Calfee, M.W., Rocha, E.R., Ling, E.A., Engstrom, E., Coleman, J.P., and  
596 Pesci, E.C. (2005) Regulation of *Pseudomonas* quinolone signal synthesis in  
597 *Pseudomonas aeruginosa*. *J Bacteriol* **187**: 4372-4380.

598 Wang, C., Liu, X., Zhang, P., Wang, Y., Li, Z., Li, X. et al. (2019) *Bacillus licheniformis*  
599 escapes from *Myxococcus xanthus* predation by deactivating myxovirescin A through  
600 enzymatic glucosylation. *Environ Microbiol* **21**: 4755-4772.

601 Whitworth, D.E., and Zwarycz, A. (2020) A Genomic Survey of Signalling in the  
602 *Myxococcaceae*. *Microorganisms* **8**.

603 Xiao, Y., Wei, X., Ebright, R., and Wall, D. (2011) Antibiotic production by myxobacteria  
604 plays a role in predation. *J Bacteriol* **193**: 4626-4633.

605 Xu, G. (2020) Evolution of LuxR solos in bacterial communication: receptors and signals.  
606 *Biotechnol Lett* **42**: 181-186.

607 Zhang, W., Wang, Y., Lu, H., Liu, Q., Wang, C., Hu, W., and Zhao, K. (2020a) Dynamics  
608 of Solitary Predation by *Myxococcus xanthus* on *Escherichia coli* Observed at the Single-  
609 Cell Level. *Appl Environ Microbiol* **86**.

610 Zhang, Z., Cotter, C.R., Lyu, Z., Shimkets, L.J., and Igoshin, O.A. (2020b) Data-Driven  
611 Models Reveal Mutant Cell Behaviors Important for Myxobacterial Aggregation.  
612 *mSystems* **5**.

613

614

615

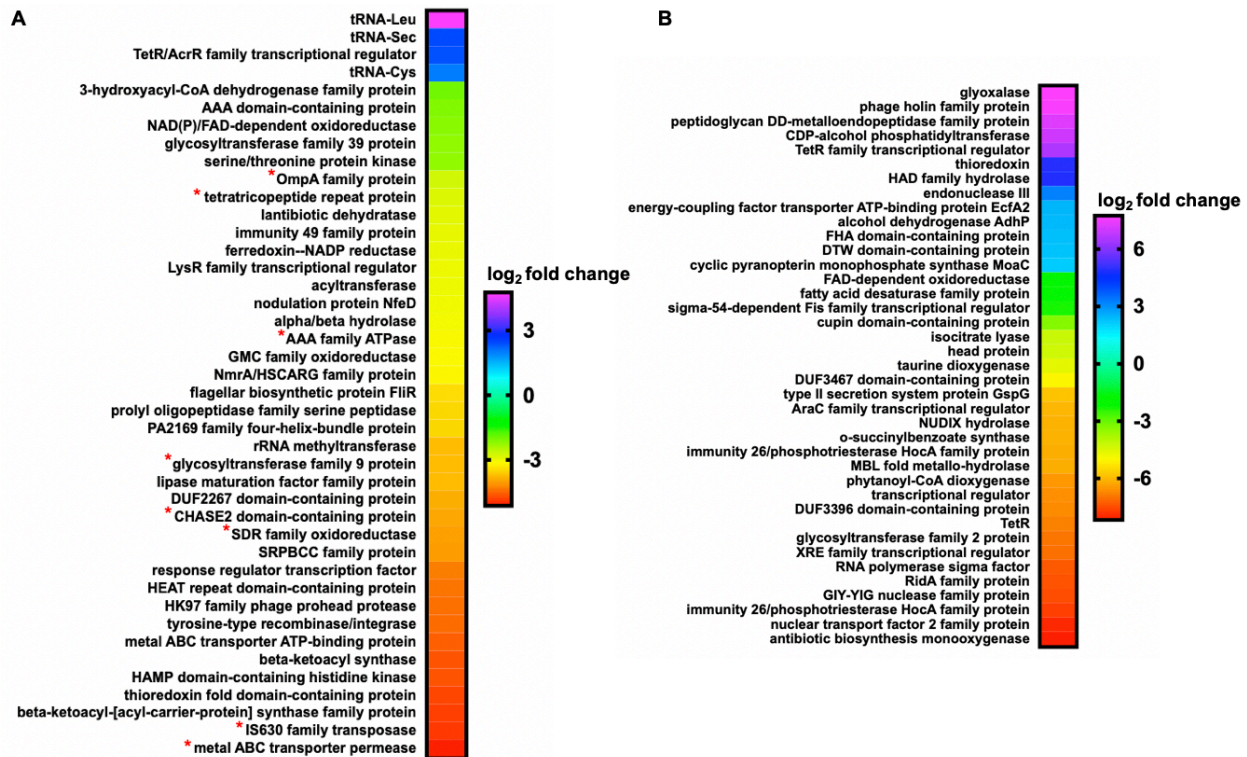

616 **Figure 1:** Transcriptomic data from myxobacteria exposed to C6-AHL. (A) Differentially  
 617 expressed genes and features from *M. xanthus* exposed to C6-AHL when compared to  
 618 signal unexposed *M. xanthus* control ( $p \leq 0.05$ ); \* indicates features also impacted at  
 619  $p \leq 0.01$ . (B) Differentially expressed genes from *C. ferrugineus* exposed to C6-AHL when  
 620 compared to signal unexposed *C. ferrugineus* control ( $p \leq 0.01$ ). Data depicted as an  
 621 average log<sub>2</sub> fold change from three biological replicates. Impacted features annotated  
 622 as hypothetical not included.

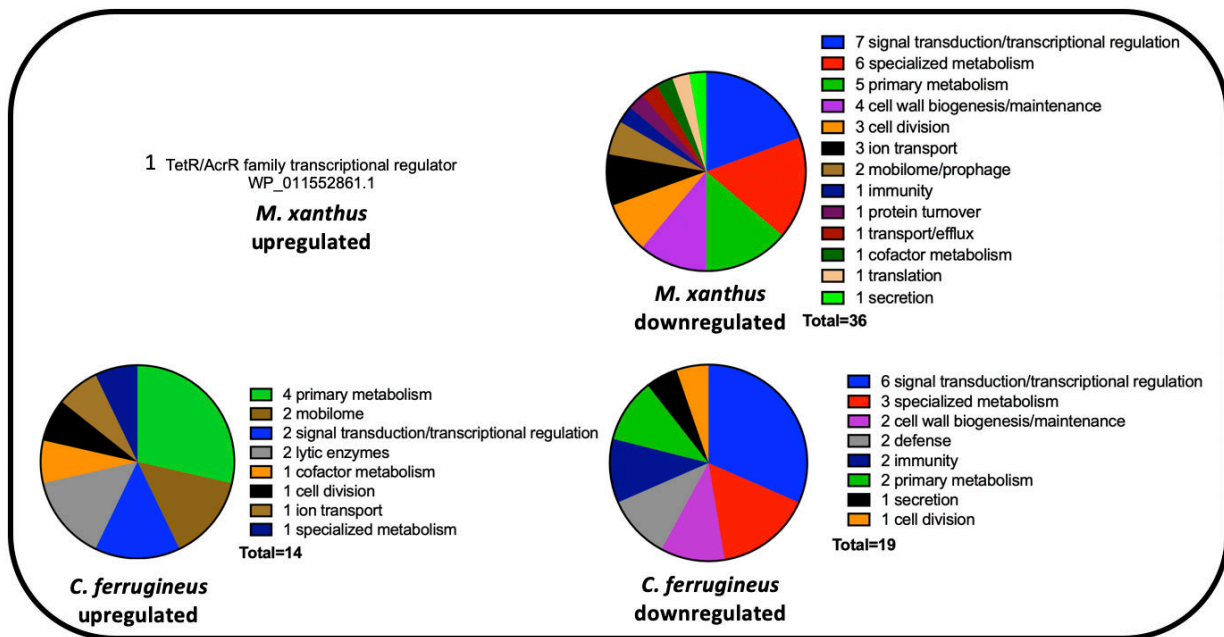

623

624 **Figure 2:** Putative roles of Prokaryotic Genome Annotation Pipeline (PGAP)-annotated  
 625 genes impacted by C6-AHL exposure (from Figure 1) comparing *M. xanthus* and *C.*  
 626 *ferrugineus*.

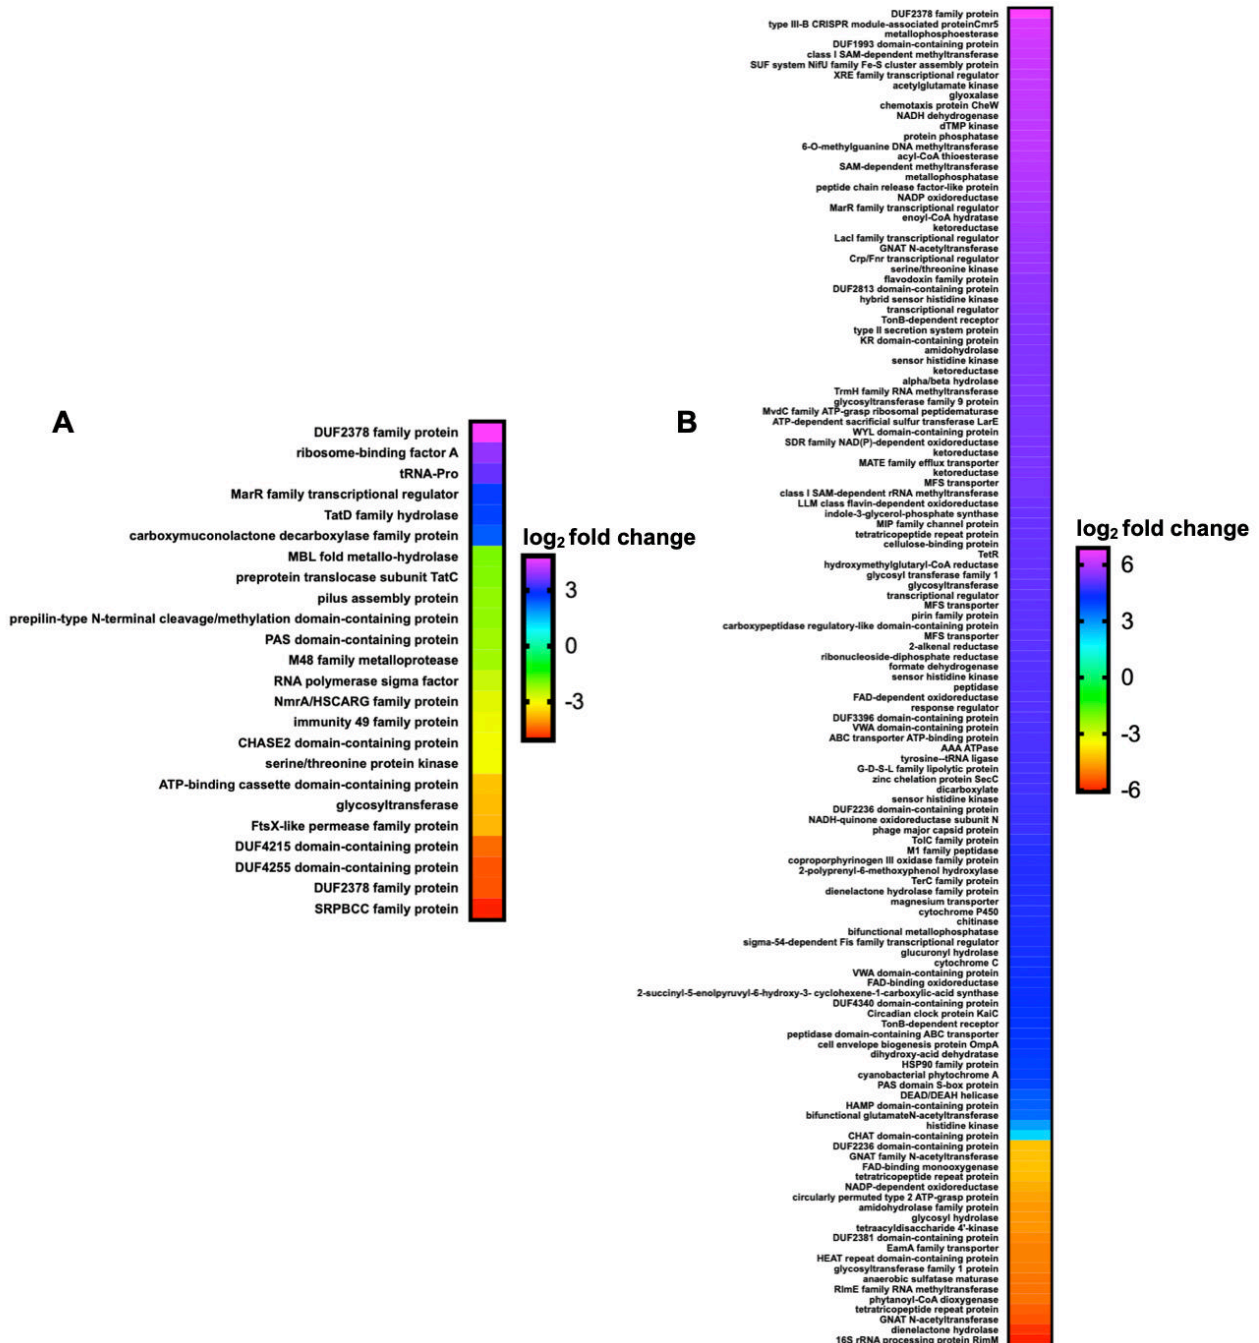

627 **Figure 3:** Transcriptomic data from myxobacteria exposed to HHQ. (A) Differentially  
 628 expressed genes and features from *M. xanthus* exposed to HHQ when compared to  
 629 signal unexposed *M. xanthus* control ( $p \leq 0.05$ ). (B) Differentially expressed genes from  
 630 *C. ferrugineus* exposed to HHQ when compared to signal unexposed *C. ferrugineus*

631 control ( $p \leq 0.05$ ). Data depicted as an average  $\log_2$  fold change from three biological  
632 replicates. Impacted features annotated as hypothetical not included.  
633



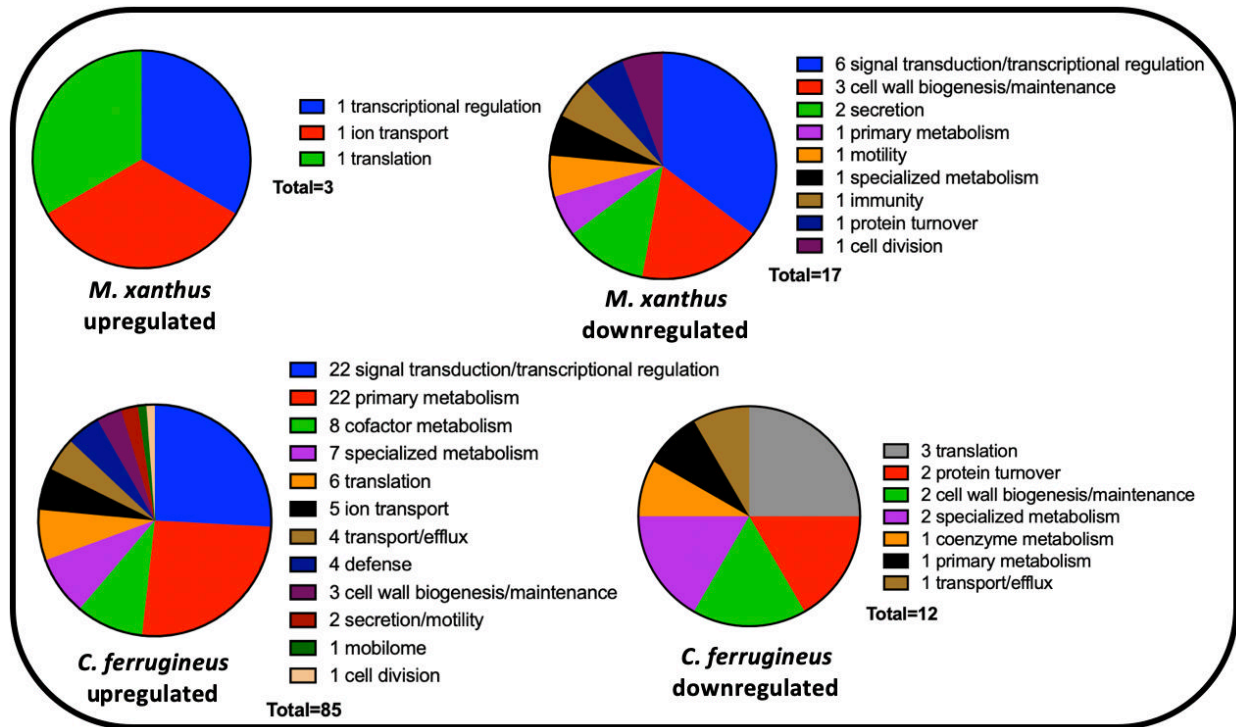

634

635 **Figure 4:** Putative roles of PGAP-annotated genes impacted by HHQ exposure (from  
 636 Figure 3) comparing *M. xanthus* and *C. ferrugineus*.

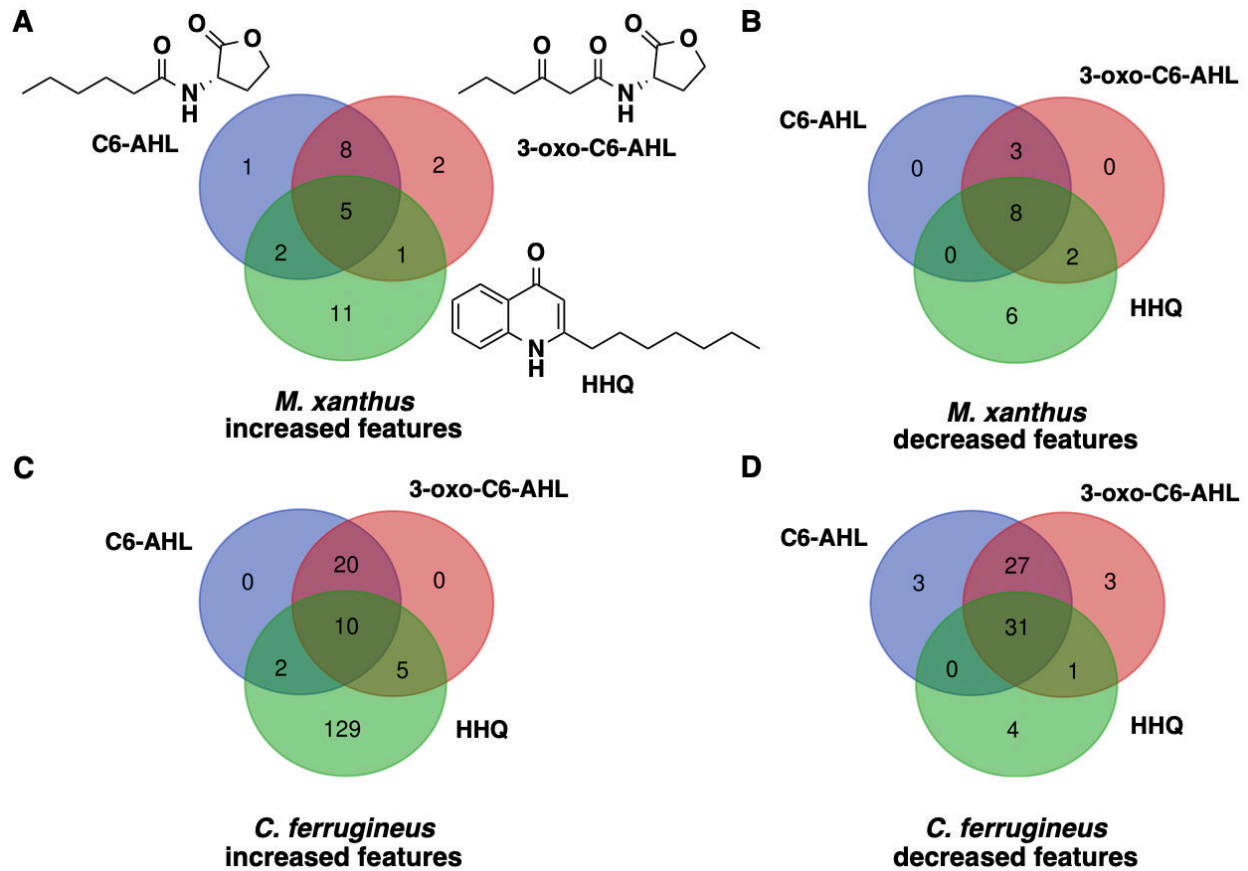

637

638 **Figure 5:** Comparison of metabolomic response to C6-AHL, 3-oxo-C6-AHL, and HHQ  
639 exposure experiments with *M. xanthus* (A and B) and *C. ferrugineus* (C and D). Numbers  
640 included in each Venn diagram account for a unique detected feature with a significantly  
641 impacted intensity upon exposure to the indicated signaling molecule provided by XCMS-  
642 multigroup analysis (n=3, p ≤0.02).

643



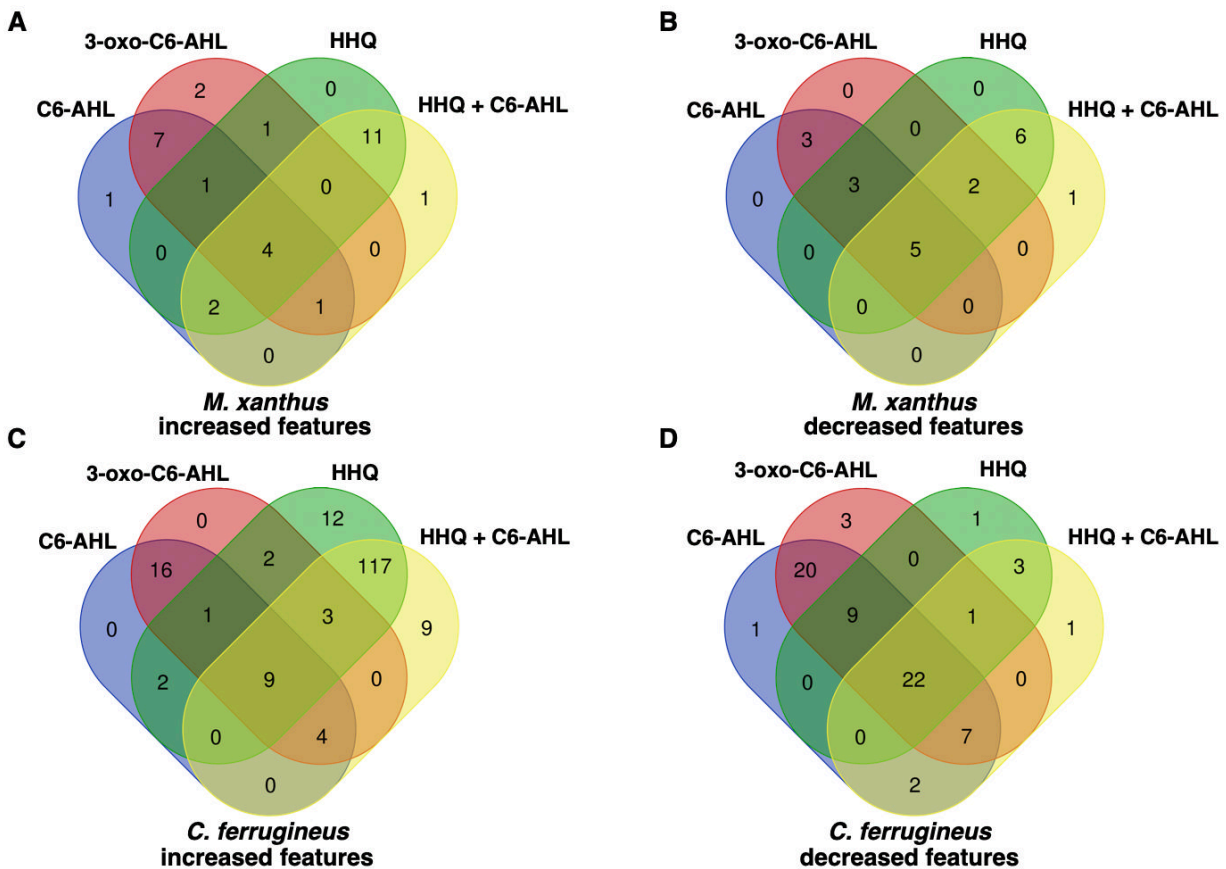

644

645 **Figure 6:** Comparison of metabolomic response to C6-AHL, 3-oxo-C6-AHL, and HHQ  
 646 exposure experiments with *M. xanthus* (A and B) and *C. ferrugineus* (C and D) including  
 647 additional C6-AHL + HHQ exposure experiments. Numbers included in each Venn  
 648 diagram account for a unique detected feature with a significantly impacted intensity upon  
 649 exposure to the indicated signaling molecule provided by XCMS-multigroup analysis  
 650 (n=3, p ≤0.02).

651

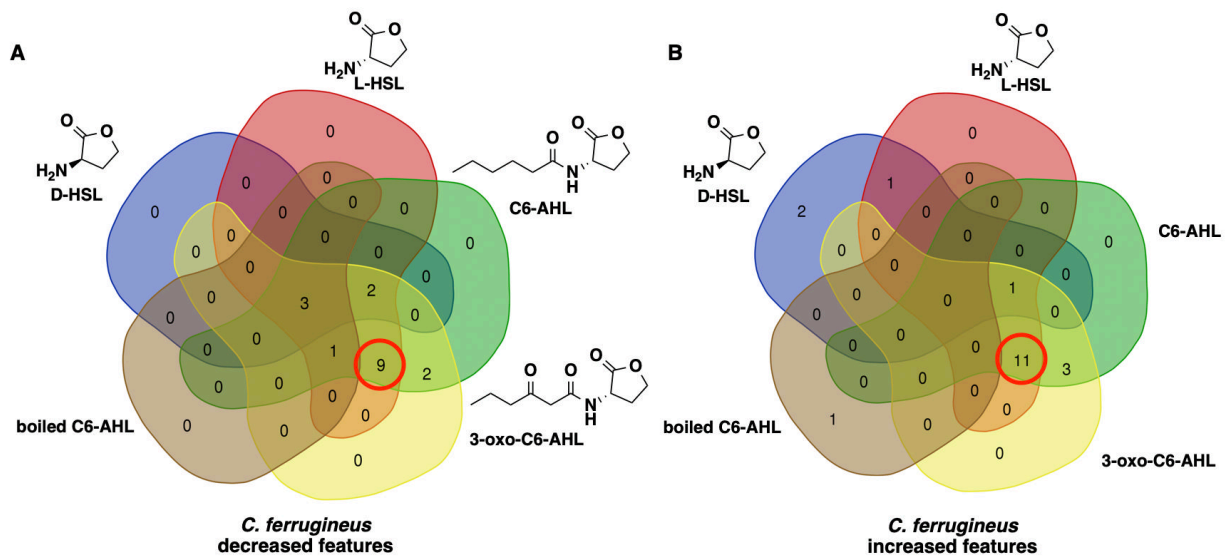

652

653 **Figure 7:** Overlap in metabolic response to C6-AHL, 3-oxo-C6-AHL, and L-HSL exposure  
654 observed from *C. ferrugineus*. Venn diagrams include the number of metabolic features  
655 with a significant increase (A) or decrease (B) in detected ion intensity compared to signal  
656 unexposed controls provided by XCMS-multigroup analysis ( $n=3$ ;  $p \leq 0.02$ ). Red circles  
657 indicate overlapping metabolic features of L-HSL with C6-AHL and 3-oxo-C6-AHL.

658

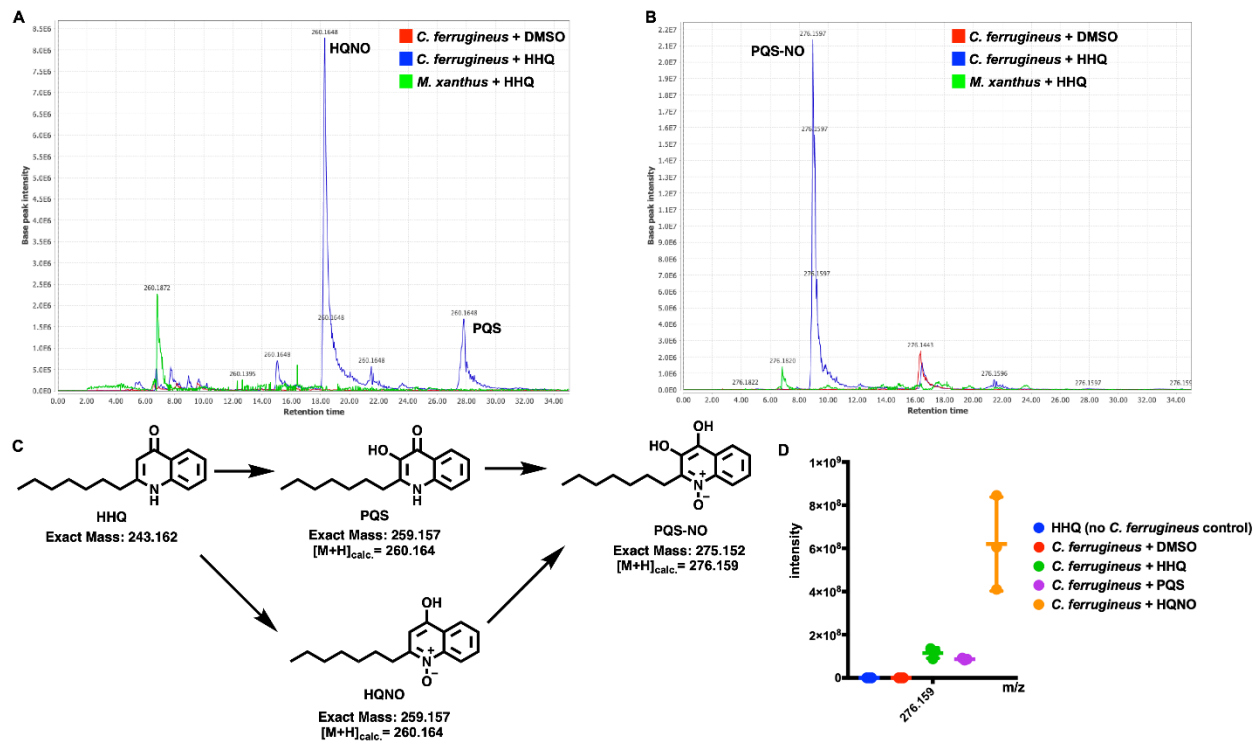

659

660 **Figure 8:** (A) Extracted ion chromatograph (EIC) depicting presence of HQNO and PQS  
 661 in HHQ exposed extracts from *C. ferrugineus* and not observed in HHQ exposed extracts  
 662 from *M. xanthus*. (B) EIC depicting presence of PQS-NO in HHQ exposed extracts of *C.*  
 663 *ferrugineus*, also not present in *M. xanthus* extracts. Chromatographs rendered with  
 664 MZmine v2.37. (C) Oxidative detoxification of HHQ by *C. ferrugineus* including exact  
 665 mass values from ChemDraw Professional v17.1. (D) Detected ion intensities for PQS-  
 666 NO comparing crude extracts of *C. ferrugineus* exposed to HHQ, PQS and HQNO;  
 667 detected intensity data provided by XCMS-multigroup analysis (n=3; p ≤0.02).

668

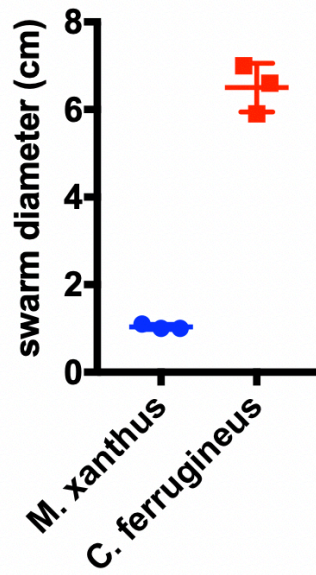

669

670 **Figure 9:** Lawn culture predation assay data depicting superior predation of *P.*  
671 *aeruginosa* by *C. ferrugineus* (n=3;  $p \leq 0.005$ ). Statistical significance calculated using an  
672 unpaired t test with Welch's correction.

673
